1 **COVID-19 incidence and mortality in the Metropolitan Region, Chile: time, space,**  
2 **and structural factors**

3 Pablo VILLALOBOS DINTRANS <sup>a</sup> \*, Claudio CASTILLO <sup>a</sup>, Felipe DE LA FUENTE <sup>b</sup>,  
4 and Matilde MADDALENO <sup>a</sup>

5 <sup>a</sup> Programa Centro Salud Pública, Facultad de Ciencias Médicas, Universidad de  
6 Santiago, Av. Libertador Bernardo O'Higgins 3363, Estación Central, Santiago, Chile

7 <sup>b</sup> Departamento de Enfermería, Facultad de Medicina, Universidad de Chile, Av.  
8 Independencia, 1027, Santiago, Chile

9

10 [pvillalobos.d@gmail.com](mailto:pvillalobos.d@gmail.com)

11 [claudio.castillo.c@usach.cl](mailto:claudio.castillo.c@usach.cl)

12 [fdelafuente@uchile.cl](mailto:fdelafuente@uchile.cl)

13 [matilde.maddaleno@usach.cl](mailto:matilde.maddaleno@usach.cl)

14 \* Corresponding author

15

16 **Abstract**

17 Chile has been heavily affected by the COVID-19 pandemic. This article analyzes the  
18 association of different groups of factors—demographic, health-related, and  
19 socioeconomic—on COVID-19-related outcomes. Using the municipalities of the  
20 Metropolitan Region the study looks at the role of time dynamics, space and place in  
21 cases and deaths during a 100-days period.

22 Results show that common and idiosyncratic elements that explain the prevalence and  
23 dynamics of infections and mortality, with an important role of social determinants of  
24 health, particularly multidimensional poverty index and use of public transportation, in  
25 explaining differences in outcomes.

26 The article contributes to the understanding of the determinants of COVID-19 outcomes  
27 in a specific region, but also highlights the need to consider time-space dynamics and  
28 social determinants as key in the analysis. The results are specially relevant for similar  
29 research in unequal settings.

## 30 **Introduction**

31 The novel coronavirus, known as Severe Acute Respiratory Syndrome 2 (SARS-Cov2)  
32 firstly described in China at the end of 2019, has produced the new coronavirus disease  
33 (COVID-19), declared as a pandemic by the World Health Organization on January 30  
34 2020 (WHO) (1,2). By 31 July 2020, this pandemic has caused over seventeen million  
35 confirmed cases and 668.910 deaths worldwide (3).

36 The region of the Americas is currently the center of the pandemic and Chile has been  
37 one of the countries more affected by this new virus (3). Despite the efforts in terms of  
38 testing and the application of several measures to stop infection (4,5), the number of  
39 cases reached 395.261 by 30 July 2020, and the country has one of the highest mortality  
40 per population in the world (6,7). In this context, understanding the factors behind the  
41 spread of the virus and the high mortality rates in the country are relevant, particularly  
42 considering that the COVID-19 is an ongoing challenge for policymakers.

43 Several studies on the determinants of COVID-19 have highlighted the multicausal  
44 nature of the disease. Research has investigated the impact of countries' demographic  
45 profile, the effect of preexisting health conditions, and the impact of socioeconomic  
46 factors in explaining COVID-19-related outcomes (8–13). This is also the case for Chile,  
47 where reports have shown how demographics and health conditions relate to COVID-19  
48 outcomes (13). However, the links with social determinants of health have been less  
49 studied in the country. Moreover, other relevant features of the disease, such as its  
50 temporal and spatial dynamics, are almost completely absent.

51 This study aims to analyze the association of different groups of factors—demographic,  
52 health-related, and socioeconomic—on COVID-19 outcomes: infections and deaths. For  
53 the analysis, we use the 52 administrative units (municipalities) in the Metropolitan  
54 Region (MR), Chile.

55 The focus on the MR area is justified by several reasons. First, in terms of scale, this is a  
56 highly-populated area (the largest in Chile), which includes the country's capital,  
57 Santiago, and where 40.5% of the Chilean population lives (14). Second, in terms of the  
58 impact of the COVID-19, by July 31 2020, the MR clusters most of the cases in the  
59 country with 71.91% of total cases and 74.58% of national deaths (13); compared to the  
60 national-level reality, the region also exhibits larger cumulative incidence rates (3491.3  
61 vs 2031.3) and mortality rates per 100,000 people (63.7 vs. 30.7) (14). Both features  
62 make this region particularly interesting in terms of research and health-care policies.  
63 Finally, the Metropolitan area has particular spatial characteristics that makes it an  
64 interesting case of analysis. On the one hand, the 52 municipalities are spread over a  
65 relatively small area, with most municipalities highly connected, creating an area where  
66 administrative boundaries exist but within a large conurbation area. As shown in Fig 1,  
67 several municipalities share a small area around the center of the region, surrounding  
68 downtown Santiago (the clearer area in the middle).

69

70 **Fig 1.** Administrative map (municipal-level) of the Metropolitan Region, Chile.

71 Source: Authors.

72

73 On the other hand, both COVID-19 outcomes and variables of interest, particularly  
74 sociodemographic variables are not randomly distributed in the MR. People cluster based  
75 on socioeconomic and demographic characteristics, such as income and age (15–19). In  
76 Chile, several studies show marked patterns of residential segregation and geographical  
77 concentration of income, particularly in the case of the MR (19–23). There is also  
78 evidence of regional inequities in access to healthcare (24–30). Space and place have  
79 increasingly been used to analyze and understand health decisions and outcomes (31,32);

80 this relationship has already proven to be important for the new COVID-19 disease (33–  
81 38). Understanding some of these features behind the infection and death patterns—in the  
82 context of an unequal and segregated city—is important for people, health-workers and  
83 policymakers, to address better prevention policies and community tailored intervention  
84 care programs. The information can also be relevant for other countries that, like the  
85 Metropolitan Region in Chile, are dealing with COVID-19 consequences and inequities.

86

## 87 **Materials and Methods**

### 88 *Data sources and variables*

#### 89 Dependent variables

90 The study proposes the analysis of the interactions of several types of determinants and  
91 COVID-19 outcomes at the municipality level. To carry out this analysis, two groups of  
92 dependent variables were used: infections and deaths. Both variables tell a different story  
93 about the COVID-19 outcomes: while cases are mostly related to the ability to prevent  
94 infection in each municipality, deaths reflect people’s response to the virus but also how  
95 the environment (including the health system’s capacity) influences the negative  
96 consequences of the disease.

97 To assess the COVID-19 impact, each one of the variables was measured considering two  
98 perspectives: level and change. The two approaches allow us to look at different ways in  
99 which the disease’s impact can be measured. The level variables capture how the  
100 “length” of COVID-19 impact on the population in a particular geographical area.  
101 Change indicators provide a different measure of impact, related to the “speed” at which  
102 COVID-19 hit a determined area: not only is it relevant how many people were infected  
103 and died but also whether this happened over a short or a large period. Quick outbreaks  
104 are a sign of municipalities’ vulnerability and inability to prevent the spread of the virus

105 but also can be relevant to understand patterns in deaths, e.g. if sudden outbreaks collapse  
106 the healthcare system. Table 1 summarizes this information.

107

108 **Table 1.** Indicators, dimensions, and dependent variables.

| Indicator/ dimension | Level                                                                         | Change                |
|----------------------|-------------------------------------------------------------------------------|-----------------------|
| Infections           | -Cumulative incidence rate (cases) after 100 days<br>-Peak of cases (daily)   | Days to peak (cases)  |
| Deaths               | -Cumulative incidence rate (deaths) after 100 days<br>-Peak of deaths (daily) | Days to peak (deaths) |

109 Source: Authors.

110

111 Six different variables of interest were used in the analysis. Cumulative incidence was  
112 calculated as the number of COVID-19 confirmed cases per 100,000 people in each  
113 municipality. On the one hand, the peak variables were defined as the highest number of  
114 current (active) cases according to symptom onset date in each administrative unit. On  
115 the other hand, the speed of the impact was measured by the number of days between the  
116 first case and the maximum number of cases and deaths registered over the 100-days  
117 period for each municipality (see Supplementary Material 1). Other measures of speed, as  
118 the average growth rate in the number of cases and deaths, required a level of detail in the  
119 data (daily basis information at municipality level) that was not available.

120 Data on the number of positive COVID-19 cases was retrieved from open-source  
121 statistics published by the Chilean Ministry of Science, Technology, Knowledge and  
122 Innovation (39). The number of deaths was obtained from the Information and Statistic  
123 Department by the Chilean Ministry of Health (40).

124

125 Independent variables

126 To identify the effect of municipality-level features on COVID-19 outcomes, three broad  
127 groups of variables were used: demographic, health, and socioeconomic variables. The  
128 main source of information is the 2017 National Socioeconomic Characterization survey  
129 (CASEN). The CASEN survey is carried out periodically by the Chilean Ministry of  
130 Social Development since 1990, and its goal is to provide information on the socio-  
131 economic conditions of Chilean families and assess the impact of social policies in the  
132 country. The survey includes a sample of almost 70,000 households for the 16  
133 administrative regions in the country. This survey is based on self-reported data. For the  
134 MR, the survey contains 42,601 individual responses (41).

135 Demographic indicators included the share of women and older people (65+ and 80+) in  
136 each municipality. These variables have shown to be related to COVID-19 outcomes in  
137 other countries (42–46). In Chile, age is highly correlated to COVID-19-related  
138 hospitalizations and deaths (13). On the other hand, although evidence is not clear yet,  
139 the percentage of children could be relevant to explain the spread of the virus as studies  
140 have found they could have a higher viral load (47,48). They also could face COVID-19-  
141 related health complications (49,50). Additionally, other variables, such as the share of  
142 migrants, the population density, and rurality were included, as they can explain both  
143 infection rates and mortality (51–54).

144 A second set of variables capture health-related factors, including the health system's  
145 features and health outcomes. As stated before, these variables have also been used in  
146 trying to identify patterns of contagion and deaths, mostly by reporting pre-existing  
147 health conditions that could relate to COVID-19 and its consequences. First, we included  
148 the population covered by the public health insurance, a self-reported variable that  
149 captures people declaring having trouble getting healthcare, and a dummy variable that  
150 identifies people that lives far from a health center (2.5 kilometers or more). These

151 variables are expected to explain mainly COVID-19-related health outcomes (deaths), as  
152 they are proxies for healthcare access and quality and also reflect other broader  
153 inequalities in the population. A dummy variable was constructed to capture whether  
154 individuals report having at least one COVID-19-related health conditions, as reported by  
155 the Centers for Disease Control and Prevention (CDC) and the information reported by  
156 the Chilean Ministry of Health, (13, 57, 58).

157 Finally, several variables that capture the socioeconomic level were considered. First,  
158 water availability can be seen both as a socioeconomic and health indicator. Given the  
159 nature of the virus, access to water is expected to impact people’s preventive behavior,  
160 particularly when hand washing has been identified as a key prevention strategy for the  
161 COVID-19 since the start of the pandemic (59-60). Second, we included poverty as an  
162 indicator that captures several risk factors associated both with higher rates of infection  
163 and death. Poverty is associated with people’s vulnerability to COVID-19 and impacts  
164 the variables of interest through several channels: poor sanitary conditions, access to  
165 information, inability to follow prevention strategies—such as handwashing, the use of  
166 facemasks, and social distancing—, and lower access to healthcare, among others. (61-  
167 65) The CASEN survey includes a variable called multidimensional poverty, an index of  
168 socioeconomic vulnerability that summarizes several aspects related to social  
169 determinants and COVID-19 (see Supplementary Material 2). Using this index has  
170 advantages and disadvantages. On the one hand, it simplifies the estimation by capturing  
171 several socioeconomic factors into one variable, as used in other studies (68, 69). On the  
172 other hand, it hinders the understanding of the underlying channels through which social  
173 determinants impact health outcomes. As highlighted by Victor Fuchs “If we constantly  
174 redefine poverty to include anything and everything that contributes to poor health, we  
175 will make little progress either in theory or practice.” (66). Consequently, we estimate



176 models including this index and others in which the different dimensions—income  
177 poverty, overcrowding, education, health insurance coverage, and job status—are  
178 considered independently. All these variables can explain infections and deaths by  
179 capturing the household’s structural inability to follow the preventive measures (hand-  
180 washing, use of face masks, physical distancing, and quarantines) and seek healthcare  
181 (e.g. health literacy) (70-75). Finally, the use of public transportation and the availability  
182 of green spaces capture people’s ability to stay at home and comply with social  
183 distancing strategies. These are expected to impact the infection rate but can also  
184 influence COVID-19 deaths, since they also show difficulty to move within the city, a  
185 factor that could be relevant in case of health emergencies (76,77)  
186 Finally, maps and spatial information were obtained from the website of the Inter-  
187 Ministerial Committee on Geographic Information (78).

188 All dummy variables were transformed to capture the percentage of people reporting each  
189 condition in each municipality. Continuous variables represent the municipality’s average  
190 value. The survey’s expansion factor at municipal-level was used to expand the sample’s  
191 values to a population estimate. A detailed definition of each variable is presented in  
192 Supplementary Material 3.

193 The selected variables cover an ample spectrum of dimensions (demographic, health, and  
194 socioeconomic factors) related to the impact (infection and deaths) of COVID-19. In  
195 terms of the spatial analysis, they include variables to explain geographical variations  
196 based on compositional issues (i.e. differences in the kind of people who live in each  
197 place) as well as contextual explanations (i.e. differences between the places),  
198 understanding that both are relevant in the relationship between health and place (79).

199

200 *Data analysis*

201 To acknowledge the temporal dynamics of the disease, the study uses a standardized 100-  
202 days period since the first case was reported in each municipality. As for the role of space  
203 and place in explaining COVID-19 cases and deaths, we used a spatial analysis approach  
204 to look at the data.

205 To identify the determinants of infection and mortality due to COVID-19 in the  
206 Metropolitan Region in Chile, we carried out multivariable regressions to explain the set  
207 of dependent variables, using the three groups of explanatory variables described above.  
208 As previously stated, one of the most salient features when performing municipality-level  
209 analysis in the Metropolitan Region in Chile is the presence of geographic clusters,  
210 particularly when looking at socioeconomic indicators. Considering the way in which  
211 COVID-19 is transmitted and the potential differences in access/quality of healthcare, we  
212 expect space and place to play an important role in determining both, values in the  
213 independent and dependent variables, as well as their interactions. This justifies the use  
214 of spatial analysis in the study.

215 The first step in the spatial analysis is the definition of neighbors. In this case, we used a  
216 first-order queen contiguity matrix, i.e. we defined as neighbors all municipalities that  
217 share a border. Given the nature of the data—the existence of clusters in different areas of  
218 the region and the high heterogeneity in the size of the municipalities—a distance-based  
219 approach was discarded (79).

220 To understand the impact of different variables in the incidence and mortality due to  
221 COVID-19 in the region, we use ordinary least squares (OLS) regressions. If space and  
222 place are relevant in determining the variables in our analysis, then the errors in the OLS  
223 regressions are spatially-correlated and, consequently, the results are biased (80). To test  
224 the presence of spatial correlation on the OLS regression, the global Moran's I test—that  
225 indicates both the existence and degree of spatial autocorrelation (82)— is applied to the

226 regression's residuals. This test shows whether the residuals are randomly distributed. If  
227 the null hypothesis is rejected, the OLS analysis needs to be adjusted to consider the  
228 spatial effects. There are two main strategies to estimate spatial autoregressive models:  
229 spatial lag and spatial error. The spatial lag model (also known as contagion model)  
230 incorporates space as a right hand-side variable, estimating a coefficient for the spatial  
231 effect; the error model does not incorporate spatial as a covariate, but includes it in the  
232 structure of the residuals (81). Conceptually, spatial lag models seem more appropriate to  
233 adjust for spatial autocorrelation in the case of infections, since it is expected that the  
234 number of COVID-19 cases in one municipality affects the cases in the neighboring  
235 areas, the contagion effects. However, this is not necessarily true for mortality,  
236 particularly once controlling for the case incidence rate. In this case, a spatial error model  
237 appears more suitable, since unobserved spatial effects are expected to drive the spatial  
238 autocorrelation in the residuals. Consequently, spatially correlated regressions of cases  
239 are adjusted using a spatial lag model, and an error model is utilized for the death  
240 regressions.

241 Incidence and mortality data were collected and calculated using Microsoft Excel.  
242 Descriptive statistics and multivariable regressions were estimated using STATA, and  
243 spatial analysis and visualizations were conducted in GeoDa.

244

## 245 **Results**

246 Table 2 shows the descriptive statistics of the sample. First, it is observed the large  
247 heterogeneity in most variables between municipalities, both in the dependent and  
248 independent variables. As stated before, this reflects the different realities within the MR,  
249 as well as the differences in terms of COVID-19 outcomes. Second, spatial  
250 autocorrelation appears as statistically significant for all the variables of interest

251 (different measures of infection and mortality), as well as many of the independent  
 252 variables, particularly those related to social determinants of health.

253

254 **Table 2.** Descriptive statistics

| Variable                           | Average  | St. Dev. | Min     | Max       | Moran's I |
|------------------------------------|----------|----------|---------|-----------|-----------|
| Cumulative incidence rate (cases)  | 2,477.00 | 901.02   | 1025.10 | 4,788.00  | 0.43***   |
| Peak of cases                      | 2,106.99 | 857.47   | 588.00  | 3,983.90  | 0.43***   |
| Days to peak of cases              | 93.00    | 11.53    | 65.00   | 118.00    | 0.16**    |
| Cumulative incidence rate (deaths) | 92.55    | 45.39    | 25.10   | 224.25    | 0.46***   |
| Peak of deaths                     | 50.79    | 29.74    | 3.51    | 137.85    | 0.18**    |
| Days to peak of deaths             | 84.27    | 15.47    | 38.00   | 107.00    | 0.10*     |
| Women                              | 0.52     | 0.02     | 0.46    | 0.56      | 0.04      |
| Children                           | 0.07     | 0.01     | 0.04    | 0.09      | -0.04     |
| People 65+                         | 0.13     | 0.04     | 0.06    | 0.23      | 0.26***   |
| People 80+                         | 0.03     | 0.01     | 0.00    | 0.07      | 0.07      |
| Migrants                           | 0.03     | 0.06     | 0.00    | 0.38      | 0.26***   |
| Population density                 | 6,165.66 | 6,152.61 | 3.73    | 22,870.32 | 0.65***   |
| Rurality                           | 0.12     | 0.21     | 0.00    | 1.00      | 0.48***   |
| Public health insurance            | 0.75     | 0.18     | 0.13    | 0.99      | 0.49***   |
| Problems accessing healthcare      | 0.00     | 0.00     | 0.00    | 0.01      | 0.03      |
| Distance to health center          | 0.88     | 0.13     | 0.45    | 0.99      | 0.29***   |
| COVID-19 risk factors              | 0.16     | 0.03     | 0.07    | 0.24      | 0.24***   |
| Water inside the house             | 0.98     | 0.02     | 0.92    | 1.00      | 0.02      |
| Multidimensional poverty           | 0.22     | 0.08     | 0.03    | 0.38      | 0.30***   |
| Income poverty                     | 0.06     | 0.03     | 0.00    | 0.14      | 0.26***   |
| No overcrowding                    | 0.89     | 0.05     | 0.78    | 0.98      | 0.27***   |
| Critical overcrowding              | 0.01     | 0.01     | 0.00    | 0.05      | 0.12*     |
| Years of education                 | 5.88     | 4.14     | 1.55    | 18.67     | 0.47***   |
| Self-employed worker               | 0.10     | 0.02     | 0.05    | 0.15      | 0.06      |
| Green spaces                       | 9.63     | 1.50     | 8.00    | 14.05     | 0.33***   |

---

|                              |      |      |      |      |         |
|------------------------------|------|------|------|------|---------|
| Use of public transportation | 0.21 | 0.07 | 0.05 | 0.41 | 0.49*** |
|------------------------------|------|------|------|------|---------|

---

255 Note: All variables are expressed as the share of the municipality's total population, except for "Population  
256 density", "Green spaces", "Years of education" and "Minutes in public transportation" that report the  
257 municipality's average. Min and Max refer to the minimum and maximum values at municipality, not  
258 individual level. Significance level: \*\*\*  $p < 0.01$ , \*\*  $p < 0.05$ , \*  $p < 0.1$ . Moran's I statistical significance was  
259 assessed using pseudo p values with 999,999 permutations.  
260

261 This result gives a first warning on the potential effect of space between COVID-19  
262 outcomes and municipal-level features. Spatial autocorrelation and measures can be  
263 broadly classified into global and local measures (83). Moran's I is a global test that  
264 indicates the presence of spatial correlation; a local test can be used to answer where this  
265 correlation is. Fig 2 shows the results for the  $G_i^*$  tests in selected dependent and  
266 independent variables. The  $G_i^*$  identify areas where the values of the variables are high  
267 or low (hot and cold spots detection) respect to the global average (83). The figure  
268 exhibits clusters around the Santiago downtown area vs peripheric municipalities, as well  
269 as an east-west pattern, particularly for socioeconomic variables.

270

271 **Fig 2.**  $G_i^*$  tests for clustering in selected variables

272 Note: Upper-left: infections (100 days cumulative rate); Upper-right: deaths (100 days cumulative  
273 rate); Middle-left: population density; Middle-right: public health insurance; Down-left: average  
274 years of education; Down-right: use of public transportation.

275 Blue: low-value clusters (95% significance); Red: high-value clusters (95% significance); Grey:  
276 not significant areas.

277

278 To identify how different variables relate to COVID-19 infections and deaths, several  
279 multivariable regressions were estimated. Table 3 presents the results for the infection-  
280 related dependent variables. As shown in Table 1, each variable has three different ways  
281 to be measured: cumulative incidence rate (columns 1 and 2), peak of cases (columns 3  
282 and 4), and days to the peak (columns 5 and 6). Each model is estimated using

283 multidimensional poverty (even columns) and a set of socioeconomic variables (odd  
284 columns).

285

286 **Table 3.** Infection regressions (OLS)

| VARIABLES                     | Cumulative incidence rate |                  | Peak            |          | Days to peak      |                  |
|-------------------------------|---------------------------|------------------|-----------------|----------|-------------------|------------------|
|                               | (1)                       | (2)              | (3)             | (4)      | (5)               | (6)              |
| Women                         | -5.434                    | -6.097           | 4.462           | 4.158    | 0.115             | 0.144            |
| Children                      | -0.043                    | -3.667           | 6.027           | 0.792    | 0.0805            | 0.073            |
| People 65+                    | 6.415                     | 5.517            | -2.984          | -4.732   | <b>-0.154**</b>   | <b>-0.135*</b>   |
| People 80+                    | 0.488                     | 6.113            | -1.859          | 1.479    | -0.0211           | -0.000521        |
| Migrants                      | -2.751                    | -5.453           | 1.504           | 1.268    | 0.0231            | 0.0429           |
| Population density            | 4.07E-05                  | <b>6.35e-05*</b> | 2.45E-05        | 4.59E-05 | -3.33E-07         | -4.92E-07        |
| Rurality                      | 0.89                      | 1.547            | -0.176          | -0.267   | -0.025            | <b>-0.044***</b> |
| Multidimensional poverty      | <b>5.065***</b>           |                  | <b>4.528***</b> |          | 1.68E-05          |                  |
| Income poverty                |                           | 2.433            |                 | 5.885    |                   | -0.0148          |
| No overcrowding               |                           | -2.11            |                 | 2.701    |                   | -0.00375         |
| Critical overcrowding         |                           | 10.98            |                 | 8.536    |                   | -0.0337          |
| Years of education            |                           | -0.101           |                 | -0.33    |                   | 0.00116          |
| Self-employed worker          |                           | 4.467            |                 | 0.117    |                   | <b>-0.198**</b>  |
| Green spaces                  | 0.0232                    | 0.0223           | -0.0161         | -0.00561 | <b>-0.000915*</b> | -0.00069         |
| Use public transportation     | <b>9.526***</b>           | <b>8.803***</b>  | 2.537           | 2.122    | -0.0459           | -0.0606          |
| Water inside the house        | -4.636                    | -2.112           | -0.262          | -1.411   | 0.0485            | 0.0593           |
| Public health insurance       |                           | 0.893            |                 | -0.86    |                   | 0.0164           |
| Difficulty getting healthcare | -91.34                    | <b>-113.2*</b>   | 30.93           | 43.17    | 1.279*            | <b>1.957**</b>   |
| Distance to health center     | 0.441                     | 0.379            | 1.347           | 1.194    | 0.00237           | -0.0095          |
| COVID-19 risk factors         | 0.0994                    | -3.177           | 4.436           | 3.435    | 0.028             | 0.0604           |
| Constant                      | 5,196                     | 6,448            | -3,440          | 490.1    | 12.54             | -5.576           |
| R-squared                     | 0.665                     | 0.692            | 0.609           | 0.632    | 0.351             | 0.428            |
| Adjusted R-squared            | 0.538                     | 0.509            | 0.461           | 0.414    | 0.105             | 0.088            |
| Moran's I (residuals)         | -0.0374                   | -0.0222          | -0.0587         | -0.0687  | -0.0309           | -0.0196          |

287 Significance level (robust standard errors): \*\*\* p<0.01, \*\* p<0.05, \* p<0.1

288

289 First, it is noted that the determinants of level and change in infections differ. As  
290 expected, the use of public transportation shows a significant and positive association  
291 with cumulative incidence rate; results for change-type regression (columns 5 and 6) are  
292 less consistent, with the share of people 65+, rurality, self-employment, green spaces, and  
293 difficulty to get healthcare showing significant coefficients. Second, multidimensional  
294 poverty appears as important to explain the number of cases (columns 1 and 3), while the  
295 effect vanishes when looking at the impact of a set of socioeconomic variables instead of  
296 the index of socioeconomic vulnerability (columns 2 and 4). The effect, as expected, is  
297 also positive showing that multidimensional poverty is a risk factor for COVID-19  
298 contagion at the municipality level. Third, the model's overall fit is better in the level-  
299 type regressions, explaining 60% of the variation in the dependent variables. In the case  
300 of estimations 5 and 6, count models using Poisson regression were also estimated;  
301 results—in terms of significance and sign of the coefficients—hold when using this  
302 alternative.

303 Finally, Moran's I tests for spatial autocorrelation of the residuals show that the  
304 hypothesis that OLS residuals are distributed randomly in the space cannot be rejected for  
305 all models. Consequently, there is no statistical justification for adjusting to consider  
306 spatial effects.

307 Table 4 presents the same set of estimations for the mortality variables. In this case, four  
308 different models are estimated for each one of the independent variables, cumulative  
309 mortality rate (columns 1 to 4), peak of deaths (columns 5 to 8), and days to the peak of  
310 deaths (columns 9 to 12). As before, each model is estimated using either the  
311 multidimensional poverty index or a set of socioeconomic factors; additionally models

312 are estimated including and excluding the cumulative incidence rate of cases as  
 313 explanatory variable (even and odd columns, respectively).

314

315 **Table 4.** Deaths regressions (OLS)

| VARIABLES                 | Cumulative incidence rate |                  |                    |                  | Peak          |               |                   |        | Days to peak   |               |                |               |
|---------------------------|---------------------------|------------------|--------------------|------------------|---------------|---------------|-------------------|--------|----------------|---------------|----------------|---------------|
|                           | (1)                       | (2)              | (3)                | (4)              | (5)           | (6)           | (7)               | (8)    | (9)            | (10)          | (11)           | (12)          |
| Women                     | -0.231                    | -0.102           | -                  | -0.030           | 0.128         | 0.176         | 0.002             | 0.064  | -0.074         | -0.093        | -0.095         | -0.096        |
|                           |                           |                  | 0.195              |                  |               |               |                   |        |                |               |                |               |
| Children                  | -0.361                    | -0.360           | -                  | -0.247           | -0.515        | -0.514        | -0.374            | -0.337 | -0.129         | -0.129        | 0.004          | 0.004         |
|                           |                           |                  | 0.347              |                  |               |               |                   |        |                |               |                |               |
| People 65+                | <b>0.345*</b>             | 0.193            | 0.236              | 0.087            | 0.056         | -0.001        | -0.080            | -0.136 | -0.023         | -0.001        | -0.091         | -0.090        |
| People 80+                | 0.088                     | 0.077            | 0.114              | -0.052           | -0.097        | -0.102        | -0.036            | -0.099 | 0.304          | 0.306         | 0.127          | 0.127         |
| Migrants                  | -0.031                    | 0.034            | -                  | 0.083            | -0.072        | -0.047        | -0.178            | -0.122 | -0.090         | -0.099        | -0.047         | -0.048        |
|                           |                           |                  | 0.065              |                  |               |               |                   |        |                |               |                |               |
| Population density        | <b>3.21e-06**</b>         | <b>2.25e-06*</b> | <b>4.60e-06***</b> | <b>2.87e-06*</b> | 0.000         | 0.000         | <b>2.50e-06**</b> | 0.000  | 0.000          | 0.000         | 0.000          | 0.000         |
| Rurality                  | -0.041                    | -                | -                  | -0.069           | -0.056        | -             | -0.013            | -0.029 | -              | -             | <b>-0.071*</b> | -             |
|                           |                           | <b>0.0625*</b>   | 0.027              |                  |               | <b>0.064*</b> |                   |        | <b>0.079**</b> | <b>0.076*</b> |                | <b>0.071*</b> |
|                           |                           |                  |                    |                  |               |               |                   |        |                | *             |                |               |
| Multidimensional poverty  | <b>0.264**</b>            | 0.144            |                    |                  | <b>0.141*</b> | 0.096         |                   |        | -0.029         | -0.012        |                |               |
|                           | *                         |                  |                    |                  |               |               |                   |        |                |               |                |               |
| Income poverty            |                           |                  | 0.020              | -0.047           |               |               | 0.339             | 0.314  |                |               | 0.033          | 0.033         |
| No overcrowding           |                           |                  | 0.158              | 0.215            |               |               | 0.068             | 0.089  |                |               | <b>0.169*</b>  | <b>0.169*</b> |
| Critical overcrowding     |                           |                  | 0.490              | 0.192            |               |               | 0.410             | 0.298  |                |               | -0.009         | -0.008        |
| Years of education        |                           |                  | -                  | 0.000            |               |               | 0.000             | 0.001  |                |               | -0.001         | -0.001        |
|                           |                           |                  | 0.003              |                  |               |               |                   |        |                |               |                |               |
| Self-employed worker      |                           |                  | 0.372              | 0.250            |               |               | <b>0.419*</b>     | 0.374  |                |               | 0.219          | 0.219         |
| Green spaces              | 0.001                     | 0.000            | 0.001              | 0.000            | 0.000         | -0.001        | 0.000             | 0.000  | 0.000          | 0.000         | 0.000          | 0.000         |
| Use public transportation | 0.216                     | -0.010           | 0.093              | -0.146           | -0.008        | -0.093        | -0.006            | -0.096 | 0.130          | 0.162         | 0.129          | 0.129         |
| Water inside the house    | -0.147                    | -0.037           | -                  | 0.001            | 0.140         | 0.181         | 0.110             | 0.131  | 0.077          | 0.061         | 0.003          | 0.003         |
|                           |                           |                  | 0.057              |                  |               |               |                   |        |                |               |                |               |
| Public health insurance   |                           |                  | 0.114              | 0.090            |               |               | 0.002             | -0.008 |                |               | -0.020         | -0.020        |



It is made available under a [CC-BY-NC-ND 4.0 International license](https://creativecommons.org/licenses/by-nc-nd/4.0/) .

|                                   |         |                     |                 |                     |                         |                         |                    |                         |                          |                         |                          |                         |
|-----------------------------------|---------|---------------------|-----------------|---------------------|-------------------------|-------------------------|--------------------|-------------------------|--------------------------|-------------------------|--------------------------|-------------------------|
| Difficulty getting healthcare     | -1.514  | 0.651               | -<br>2.022      | 1.050               | 3.231                   | <b>4.043*</b>           | 1.181              | 2.336                   | 0.918                    | 0.606                   | 0.658                    | 0.655                   |
| Distance to health center         | 0.005   | -0.006              | 0.038           | 0.028               | -0.004                  | -0.008                  | 0.023              | 0.020                   | -<br><b>0.077**</b>      | -<br><b>0.076*</b>      | -0.048                   | -0.048                  |
| COVID-19 risk factors             | -0.148  | -0.151              | -<br>0.218      | -0.132              | -0.150                  | -0.151                  | -0.166             | -0.133                  | -0.081                   | -0.081                  | -0.012                   | -0.012                  |
| Cumulative incidence rate (cases) |         | <b>0.023**</b><br>* |                 | <b>0.027**</b><br>* |                         | 0.009                   |                    | 0.010                   |                          | -0.003                  |                          | 0.000                   |
| Constant                          | 234.500 | 111.300             | -<br>49.38<br>0 | -<br>224.400        | -<br>127.80<br>0        | -<br>174.00<br>0        | -<br>152.00<br>0   | -<br>217.80<br>0        | 95.170                   | 112.90<br>0             | -11.640                  | -<br>11.480             |
| R-squared                         | 0.747   | 0.822               | 0.732           | 0.821               | 0.481                   | 0.505                   | 0.523              | 0.553                   | 0.636                    | 0.642                   | 0.711                    | 0.711                   |
| Adjusted R-squared                | 0.652   | 0.747               | 0.572           | 0.706               | 0.284                   | 0.299                   | 0.240              | 0.264                   | 0.499                    | 0.493                   | 0.539                    | 0.525                   |
| Moran's I (residuals)             | -0.023  | -0.002              | -<br>0.054      | -0.028              | -<br><b>0.165*</b><br>* | -<br><b>0.169*</b><br>* | -<br><b>0.139*</b> | -<br><b>0.149*</b><br>* | -<br><b>0.200**</b><br>* | -<br><b>0.164*</b><br>* | -<br><b>0.233**</b><br>* | -<br><b>0.191*</b><br>* |

316 Significance level (robust standard errors): \*\*\* p<0.01, \*\* p<0.05, \* p<0.1

317

318 The first result is that the determinants of infections and deaths are not the same.

319 However, as expected, some variables seem to explain variation in both types of  
320 variables. As in the case of infections, level-type and change-type estimations present  
321 common and specific determinants.

322 For deaths, for level-type variables (columns 1 to 8) the share of people over 65 years  
323 old, population density, multidimensional poverty, and the prevalence of cases have  
324 significant and positive coefficients; overcrowding and distance to a health center also  
325 contribute to explain whether a municipality reaches the peak of cases faster or slower.

326 Just like in the case of infection models, multidimensional poverty captures an effect that  
327 is not explained by a broad set of socioeconomic factors. The model also does a better job  
328 explaining cumulative rates than peaks and days to the peak, and the overall fit ( $R^2$ ) is  
329 larger than for the infection regressions in Table 3. As before, using Poisson regressions  
330 for days to the peak does not change the main results.

331 Unlike the infection regressions, in this case, the hypothesis of a random spatial  
 332 distribution of the residuals is rejected in 8 out of 12 cases, highlighting the need to use  
 333 spatial regression models to take into account the presence of spatial autocorrelation.  
 334 Based on the results from Tables 3 and 4, a simplified set of regressions is estimated. A  
 335 potential problem with inference, in this case, is related to the degrees of freedom due to  
 336 a large number of explanatory variables and the relatively small sample (n=52). Table 5  
 337 shows these reduced models, based on the previous results (infection and deaths OLS  
 338 regressions). As emphasized above, both variables (cases and deaths) share some  
 339 explanatory variables and differ in others. In this case, it is also observed that level-type  
 340 and change-type models have different determinants. Notably, the overall fit of the model  
 341 using a reduced set of independent variables is similar to the one obtained in Tables 3 and  
 342 4, showing that an important proportion of the variation in the variables of interest can be  
 343 explained by a small set of variables.

344

345 **Table 5.** Simplified regressions (OLS)

| VARIABLES                        | Cumulative<br>infection<br>rate | Peak of<br>cases | Days to<br>peak (cases) | Cumulative<br>death rate | Peak of<br>deaths | Days to peak<br>(deaths) |
|----------------------------------|---------------------------------|------------------|-------------------------|--------------------------|-------------------|--------------------------|
|                                  | (1)                             | (2)              | (3)                     | (4)                      | (5)               | (6)                      |
| People 65+                       |                                 |                  |                         | <b>0.147*</b>            | 0.0923            | 0.027                    |
| Population density               | <b>4.25e-05*</b>                | <b>3.19e-05*</b> | -3.82E-07               | <b>2.61e-06***</b>       | 8.96E-07          | 2.12E-07                 |
| Rurality                         |                                 |                  |                         | <b>-0.0568***</b>        | <b>-0.070***</b>  | <b>-0.114***</b>         |
| Multidimensional<br>poverty      | <b>5.691***</b>                 | <b>5.185***</b>  | 0.00244                 | 0.115*                   | 0.0905            | -0.0212                  |
| Use public<br>transportation     | <b>4.697***</b>                 | <b>5.076***</b>  | <b>0.0688**</b>         |                          |                   |                          |
| Difficulty getting<br>healthcare | -31.23                          | 4.56             | -0.175                  |                          |                   |                          |
| Distance to health<br>center     |                                 |                  |                         | -0.00164                 | -0.0229           | <b>-0.0943***</b>        |
| Cumulative<br>incidence          |                                 |                  |                         | <b>0.0225***</b>         | 0.00523           | -0.000648                |

|                       |       |        |                 |         |         |                 |
|-----------------------|-------|--------|-----------------|---------|---------|-----------------|
| Constant              | 33.57 | -280.9 | <b>80.76***</b> | -15.59  | 29.01   | <b>155.0***</b> |
| R-squared             | 0.568 | 0.562  | 0.101           | 0.805   | 0.423   | 0.576           |
| Adjusted R-squared    | 0.532 | 0.525  | 0.025           | 0.780   | 0.346   | 0.519           |
| Moran's I (residuals) | 0.081 | -0.087 | <b>0.1251**</b> | -0.0056 | -0.1118 | <b>-0.1418*</b> |

346 Significance level (robust standard errors): \*\*\* p<0.01, \*\* p<0.05, \* p<0.1  
347

348 Finally, considering the presence of spatial autocorrelation in the OLS residuals, spatial  
349 regressions are used to control for these effects. As discussed above, a spatial lag  
350 regression is used for the infection model (column 1), while spatial error regressions are  
351 estimated for death models (columns 2 to 10). In both cases, the same specification used  
352 in Tables 2 to 5 was utilized.

353

354 **Table 6. Spatial regressions**

|                          | Days to peak (cases) |                           | Peak of deaths            |                          |                    |                            | Days to peak (deaths)     |                           |                           |                           |
|--------------------------|----------------------|---------------------------|---------------------------|--------------------------|--------------------|----------------------------|---------------------------|---------------------------|---------------------------|---------------------------|
|                          | (1)                  | (2)                       | (3)                       | (4)                      | (5)                | (6)                        | (7)                       | (8)                       | (9)                       | (10)                      |
| Women                    |                      | -9.456                    | 23.377                    | -30.26                   | 45.136             | 76.743                     | 63.092                    | 2.711                     | -25.066                   |                           |
| Children                 |                      | -<br><b>620.043</b><br>** | -<br><b>613.191</b><br>** | -<br><b>522.59</b><br>2* | -<br>496.78<br>7   | -<br><b>285.822*</b><br>*  | -<br><b>259.304</b><br>** | -100.258                  | -102.77                   |                           |
| People 65+               |                      | 8.708                     | -23.345                   | -99.113                  | -<br>153.40<br>3   | -<br><b>130.896*</b><br>** | -<br><b>117.632</b><br>** | <b>-95.151*</b>           | -76.386                   | -45.941                   |
| People 80+               |                      | 103.343                   | 97.8213                   | 165.10<br>6              | 134.54<br>7        | 65.410                     | 72.103                    | 142.891                   | 158.972                   |                           |
| Migrants                 |                      | -77.8217                  | -68.4965                  | -139.26                  | -107.79            | -34.884                    | -35.264                   | <b>-75.032*</b>           | -<br><b>87.199*</b><br>*  |                           |
| Population density       | -0.0004              | <b>0.002**</b>            | <b>0.002**</b>            | <b>0.003*</b><br>**      | <b>0.002*</b><br>* | -4.43E-05                  | -7.62E-05                 | -4.45E-04                 | -3.17E-04                 | <b>-0.0005*</b>           |
| Rurality                 |                      | -<br><b>70.224*</b><br>*  | -<br><b>73.757*</b><br>*  | -<br>49.268<br>7         | -<br>60.449<br>7   | -<br><b>74.930**</b><br>*  | -<br><b>74.644*</b><br>** | -<br><b>68.746*</b><br>** | -<br><b>65.216*</b><br>** | -<br><b>79.102*</b><br>** |
| Multidimensional poverty | -8.085               | <b>101.431</b><br>**      | <b>83.265*</b>            |                          |                    | -26.906                    | -24.657                   |                           |                           | <b>-35.465*</b>           |
| Income poverty           |                      |                           |                           | -67.462                  | -94.926            |                            |                           | 67.6838                   | 82.5887                   |                           |

It is made available under a [CC-BY-NC-ND 4.0 International license](https://creativecommons.org/licenses/by-nc-nd/4.0/) .

|                               |                |                |                 |               |                 |                 |                |                 |                 |                 |
|-------------------------------|----------------|----------------|-----------------|---------------|-----------------|-----------------|----------------|-----------------|-----------------|-----------------|
| No overcrowding               |                |                | 44.953          | 52.752        |                 |                 |                | -               | -               |                 |
|                               |                |                |                 |               |                 |                 |                | <b>102.822</b>  | <b>106.482</b>  |                 |
|                               |                |                |                 |               |                 |                 |                | **              | **              |                 |
| Critical overcrowding         |                |                | 464.01          | 431.90        |                 |                 |                | -57.8263        | -43.1727        |                 |
|                               |                |                | 1               | 4             |                 |                 |                |                 |                 |                 |
| Years of education            |                |                | 4.0846          | 4.474         |                 |                 |                | <b>6.544**</b>  | <b>6.460**</b>  |                 |
| Self-employed worker          |                |                | 228.15          | 177.62        |                 |                 |                | -38.352         | -21.033         |                 |
|                               |                |                |                 | 5             |                 |                 |                |                 |                 |                 |
| Green spaces                  | 0.4810         | 0.384          | 0.482           | 0.329         | 0.0818          | 0.0564          | -0.041         | 0.013           |                 |                 |
| Use public transportation     | <b>63.946*</b> | -27.383        | -68.326         | -70.828       | -               | -37.726         | -28.510        | -9.6124         | 16.709          |                 |
|                               | *              |                |                 | 141.33        | 8               |                 |                |                 |                 |                 |
| Water inside the house        | -131.964       | -104.831       | 7.413           | 59.075        | 48.668          | 31.673          | 27.682         | 1.949           |                 |                 |
| Public health insurance       |                |                | 68.686          | 62.570        |                 |                 | 10.194         | 12.184          |                 |                 |
| Difficulty getting healthcare | -24.329        | 1727.94        | 2189.74         | 1155.4        | 2209.2          | 342.868         | 282.777        | -294.38         | -667.431        |                 |
|                               |                |                | 8               |               |                 |                 |                |                 |                 |                 |
| Distance to health center     | -36.986        | -36.69         | -8.613          | -8.224        | -               | -               | -              | -               | -               | -               |
|                               |                |                |                 |               | <b>66.302**</b> | <b>66.918*</b>  | <b>76.052*</b> | <b>76.081*</b>  | <b>67.963*</b>  |                 |
|                               |                |                |                 |               | *               | **              | **             | **              | **              | **              |
| COVID-19 risk factors         | -131.877       | -128.927       | -85.627         | -50.797       | -29.793         | -38.610         | -29.862        | -40.965         |                 |                 |
| Cumulative incidence          |                | 0.003          |                 | 0.005         |                 |                 | -0.0005        | -0.0023         | -1.69E-03       |                 |
| Spatial term                  | <b>-0.342*</b> | <b>-0.459*</b> | <b>-0.477**</b> | -             | -               | -               | -              | <b>-0.539**</b> | <b>-0.469**</b> | <b>-0.546**</b> |
|                               |                |                |                 | <b>0.601*</b> | <b>0.667*</b>   | <b>0.745***</b> | <b>0.625**</b> |                 |                 |                 |
|                               |                |                |                 | *             | **              | ***             | *              |                 |                 |                 |
| Constant                      | <b>51.637*</b> | 249.626        | 213.952         | -29.889       | -               | 117.311         | 138.781        | 179.811         | 217.897         | <b>74.778*</b>  |
|                               | **             |                |                 | 115.97        | 6               |                 |                |                 |                 | **              |
| R-squared                     | 0.166          | 0.516          | 0.523           | 0.547         | 0.570           | 0.693           | 0.674          | 0.712           | 0.706           | 0.614           |
| Moran's I (residuals)         | -0.002         | <b>-0.142*</b> | <b>-0.143*</b>  | -0.111        | -0.108          | -0.099          | -0.113         | -               | -               | 0.012           |
|                               |                |                |                 |               |                 |                 |                | <b>0.203**</b>  | <b>0.183**</b>  |                 |
|                               |                |                |                 |               |                 |                 |                | *               | *               |                 |

355 Significance level: \*\*\* p<0.01, \*\* p<0.05, \* p<0.1

356

357 First, adding a spatial dimension removes the spatial correlation in the residuals in six

358 cases where OLS residuals show spatial autocorrelation: days to peak of cases (column

359 1), peak of deaths (columns 2 to 5), and days to peaks of deaths (columns 6 to 10).

360 However, overall the results improve, reflecting the addition of a previously omitted

361 significant variable. Not only overall fit increases ( $R^2$ ) but also results in terms of

362 individual coefficients become more consistent. As Table 6 shows, the percentage of  
363 children and the rurality reduces the magnitude in the peak of deaths but makes it quickly  
364 (reduce the days to the peak). The opposite occurs for multidimensional poverty, again, a  
365 risk factor to explain the level and velocity of deaths. The speeding effect is also  
366 observed for the percentage of people 65+, migrants, overcrowding, and distance to  
367 health centers, while the years of education increase the number of days to reach the  
368 peak. As before, population density shows positive and significant coefficients for the  
369 peak of deaths regressions.

370

## 371 **Discussion**

372 Using municipality-level data on 52 administrative units, the article explored the effects  
373 of different sets of variables, acknowledging the need to consider a broad set of variables,  
374 as well as time dynamics and spatial effects in the analysis.

375 Several conclusions are drawn from the results. First, there are common and idiosyncratic  
376 elements that explain the prevalence and dynamics of infections and mortality. It is  
377 necessary to recognize these different approaches when discussing the “impact” on  
378 COVID-19. In this line, the proposed models are better explaining variation in levels of  
379 infections and deaths than changes (measured as days to the peak). Research on the  
380 outcomes of COVID-19 needs to incorporate different perspectives (measures of impact  
381 and determinants) to shed light on the problem. Second, as long as different models are  
382 required to tell different stories (34 estimations in this case), a significant part of the  
383 municipal variation in infections and deaths can be explained by a rather small number of  
384 variables (as in Table 5). In any case, all the results highlight the role of social  
385 determinants of health in explaining the dissimilar impact of COVID-19 in the MR as  
386 well as other findings in other countries about unequal distribution of COVID-19 (83-86).

387 In this line, the use of multidimensional poverty index as a determinant of COVID-19  
388 outcomes is an interesting result; the indicator shows to be relevant to explain infections  
389 and deaths, doing a good job capturing the complex nature of the problem, highlighting  
390 the role played by structural determinants—particularly with poverty and vulnerability—  
391 and showing similar outcomes to other studies (87-90) This result has more relevance  
392 considering that COVID-19 also has an impact on socioeconomic factors, generating a  
393 vicious circle between both problems (91-93). Third, the results identify different types of  
394 variables that explain the COVID-19 outcomes: demographic, health-related, and  
395 socioeconomic. However, these determinants can also be grouped according to their  
396 degree of changeability. Some of the relevant indicators can be seen—at least in the short  
397 run—as fixed (such as poverty and age distribution), while others are more likely to be  
398 changed (like the use of public transportation and the availability of a health center).  
399 From a public policy perspective, this classification is useful: the first group of indicators  
400 can be assumed in the short-term as “explanatory” but be used for long-term planning; on  
401 the other hand, the second group of indicators are “policy tools” and can be used as  
402 control knobs to short-term responses to the pandemic.

403 The article has some limitations that need to be taken into account when interpreting the  
404 results. First, there are time-differences between dependent and independent variables:  
405 while dependent variables reflect information between March and July 2020, independent  
406 variables come mainly from a survey carried out three years before. Unfortunately, there  
407 is no other municipality-level representative source with more updated information.  
408 However, most of the variables are expected to be similar today. There are at least two  
409 reasons for this. First, aggregated data is expected to change slower than individual-level  
410 data. Second, as discussed above, most variables reflect structural factors—such as  
411 demographic and socioeconomic features—that are not expected to change significantly

412 in a three-year period. This is also expected for “policy tools” variables (such as the  
413 patterns of use of public transportation) in absence of a policy shock. Second, there is a  
414 difficulty in choosing the concrete way to measure the relevant outcomes. Of course,  
415 different specifications can lead to different results. In this analysis, the issue was  
416 confronted by using several perspectives (infections and deaths, and levels and change).  
417 In a similar vein, methodological choices are also required when selecting the unit of  
418 analysis. In this case, we focused on municipalities and used percentages of individuals  
419 (instead of, for example, households) to calculate the independent variables. Finally,  
420 regarding spatial analysis, the definition of neighbors is also a crucial one; although in  
421 this case the selection of contiguous units is justified by the features of the data (the  
422 existence of units of different sizes and the spatial patterns of the variables of interest).  
423 The Metropolitan Region is a good case for spatial analysis but other geographical areas  
424 could also be of interest to understand the COVID-19 dynamics and policy responses  
425 (e.g. for establishing regional or international sanitary customs).

426

## 427 **Conclusions**

428 This article presents a multi-perspective analysis of the COVID-19 impact in the  
429 Metropolitan Region, Chile. It provides several interesting insights for understanding the  
430 patterns and dynamics of the disease, and highlights the need to look at social  
431 determinants of health and spatiotemporal dynamics in the analysis of COVID-19 (94). It  
432 also opens a large space for further research questions that could not be answered here.  
433 One important question related to the outcomes and relationships once the pandemic is  
434 finished. The use of a 100-days period allows us to understand the evolution of the  
435 disease so far but it is a snapshot of an ongoing issue. Additionally, better availability and  
436 quality of data can help to understand the underlying factors behind the changes in

437 COVID-19 outcomes. We proposed an imperfect indicator for measuring the speed of  
438 changes. There are still relevant questions to answer in this line. Finally, the estimations  
439 are based on municipalities' structural features; the understanding of COVID-19  
440 outcomes can also improve by adding real-time variables related to people's behavior,  
441 such as the percentage of people using face masks, or better data on mobility within and  
442 between geographical areas.

443 We believe the analysis contributes to the worldwide effort for understanding the social  
444 determinants and effects of the COVID-19. Our results can be used to promote health in  
445 all policies and to enhance intersector efforts to face this pandemic. We expect these  
446 results to be particularly useful for policymakers, and hope they can encourage the  
447 implementation of evidence-based solutions and tailored interventions to help minimize  
448 the negative effects of the pandemic tackling social inequalities.

449

450 **Acknowledgments:** The authors thanks comments and suggestions from Carla Castillo-  
451 Laborde, Ítalo López, and Felipe Elorrieta.

452

### 453 **References**

- 454 1. Li Q, Guan X, Wu P, Wang X, Zhou L, Tong Y, et al. Early Transmission  
455 Dynamics in Wuhan, China, of Novel Coronavirus-Infected Pneumonia. *N Engl J*  
456 *Med.* 2020 26;382(13):1199–207.
- 457 2. World Health Organization. Virtual press conference on COVID-19 - 11 March  
458 2020. Available from:[https://www.who.int/docs/default-](https://www.who.int/docs/default-source/coronaviruse/transcripts/who-audio-emergencies-coronavirus-press-conference-full-and-final-11mar2020.pdf)  
459 [source/coronaviruse/transcripts/who-audio-emergencies-coronavirus-press-](https://www.who.int/docs/default-source/coronaviruse/transcripts/who-audio-emergencies-coronavirus-press-conference-full-and-final-11mar2020.pdf)  
460 [conference-full-and-final-11mar2020.pdf](https://www.who.int/docs/default-source/coronaviruse/transcripts/who-audio-emergencies-coronavirus-press-conference-full-and-final-11mar2020.pdf)



- 461 3. World Health Organization. Coronavirus disease (COVID-19) Situation Report-  
462 193 [Internet]. 2020. Available from: [https://www.who.int/docs/default-](https://www.who.int/docs/default-source/coronaviruse/situation-reports/20200731-covid-19-sitrep-193.pdf?sfvrsn=42a0221d_4)  
463 [source/coronaviruse/situation-reports/20200731-covid-19-sitrep-](https://www.who.int/docs/default-source/coronaviruse/situation-reports/20200731-covid-19-sitrep-193.pdf?sfvrsn=42a0221d_4)  
464 [193.pdf?sfvrsn=42a0221d\\_4](https://www.who.int/docs/default-source/coronaviruse/situation-reports/20200731-covid-19-sitrep-193.pdf?sfvrsn=42a0221d_4)
- 465 4. IHME | COVID-19 Projections [Internet]. Institute for Health Metrics and  
466 Evaluation. [cited 2020 Aug 24]. Available from: <https://covid19.healthdata.org/>
- 467 5. Canals M, Cuadrado C, Canals A, Yohannessen K, Lefio LA, Bertoglia MP, et al.  
468 Epidemic trends, public health response and health system capacity: the Chilean  
469 experience in four months of the COVID-19 pandemic. *Revista Panamericana de*  
470 *Salud Pública*. 2020 Aug 15;44:1.
- 471 6. Coronavirus (COVID-19) Deaths - Statistics and Research [Internet]. Our World  
472 in Data. [cited 2020 Aug 24]. Available from: [https://ourworldindata.org/covid-](https://ourworldindata.org/covid-deaths)  
473 [deaths](https://ourworldindata.org/covid-deaths)
- 474 7. Johns Hopkins Coronavirus Resource Center. Mortality Analyses [Internet]. Johns  
475 Hopkins Coronavirus Resource Center. [cited 2020 Aug 24]. Available from:  
476 <https://coronavirus.jhu.edu/data/mortality>
- 477 8. Su D, Chen Y, He K, Zhang T, Tan M, Zhang Y, et al. Influence of socio-  
478 ecological factors on COVID-19 risk: a cross-sectional study based on 178  
479 countries/regions worldwide. medRxiv. 2020 May 4;2020.04.23.20077545.
- 480 9. Raifman MA, Raifman JR. Disparities in the Population at Risk of Severe Illness  
481 From COVID-19 by Race/Ethnicity and Income. *Am J Prev Med*. 2020  
482 Jul;59(1):137–9.
- 483 10. You H, Wu X, Guo X. Distribution of COVID-19 Morbidity Rate in Association  
484 with Social and Economic Factors in Wuhan, China: Implications for Urban  
485 Development. *Int J Environ Res Public Health* [Internet]. 2020 May [cited 2020

- 486 Sep 1];17(10). Available from:  
487 <https://www.ncbi.nlm.nih.gov/pmc/articles/PMC7277377/>
- 488 11. Turner-Musa J, Ajayi O, Kemp L. Examining Social Determinants of Health,  
489 Stigma, and COVID-19 Disparities. Healthcare (Basel) [Internet]. 2020 Jun 12  
490 [cited 2020 Sep 1];8(2). Available from:  
491 <https://www.ncbi.nlm.nih.gov/pmc/articles/PMC7349778/>
- 492 12. Bambra C, Riordan R, Ford J, Matthews F. The COVID-19 pandemic and health  
493 inequalities. J Epidemiol Community Health [Internet]. 2020 Jun 12 [cited 2020  
494 Sep 1]; Available from: [https://jech.bmj.com/content/early/2020/06/13/jech-2020-](https://jech.bmj.com/content/early/2020/06/13/jech-2020-214401)  
495 [214401](https://jech.bmj.com/content/early/2020/06/13/jech-2020-214401)
- 496 13. Ministerio de Salud Departamento de Epidemiología, Gobierno de Chile. Informe  
497 Epidemiológico N°38 Enfermedad por SARS-CoV2 (COVID-19) Chile  
498 31/07/2020 [Internet]. 2020. Available from: [https://www.minsal.cl/wp-](https://www.minsal.cl/wp-content/uploads/2020/08/Informe_EPI_31_07_20.pdf)  
499 [content/uploads/2020/08/Informe EPI 31 07 20.pdf](https://www.minsal.cl/wp-content/uploads/2020/08/Informe_EPI_31_07_20.pdf)
- 500 14. Instituto Nacional de Estadísticas. Síntesis de Resultados CENSO 2017 [Internet].  
501 Available from: [https://www.censo2017.cl/descargas/home/sintesis-de-resultados-](https://www.censo2017.cl/descargas/home/sintesis-de-resultados-censo2017.pdf)  
502 [censo2017.pdf](https://www.censo2017.cl/descargas/home/sintesis-de-resultados-censo2017.pdf)
- 503 15. Durlauf SN. A theory of persistent income inequality. J Econ Growth. 1996 Mar  
504 1;1(1):75–93.
- 505 16. Bayer P, McMillan R, Rueben K. An Equilibrium Model of Sorting in an Urban  
506 Housing Market [Internet]. National Bureau of Economic Research, Inc; 2004  
507 Nov [cited 2020 Aug 24]. Report No.: 10865. Available from:  
508 <https://econpapers.repec.org/paper/nbrnberwo/10865.htm>

- 509 17. Voss P, Long D, Hammer R, Friedman S. County child poverty rates in the US: a  
510 spatial regression approach. *Population Research and Policy Review*.  
511 2006;25(4):369–91.
- 512 18. Call MA, Voss PR. Spatio-Temporal Dimensions of Child Poverty in America,  
513 1990–2010. *Environ Plan A*. 2016 Jan;48(1):172–91.
- 514 19. Curtis KJ, Lee J, O’Connell HA, Zhu J. The Spatial Distribution of Poverty and  
515 the Long Reach of the Industrial Makeup of Places: New Evidence on Spatial and  
516 Temporal Regimes. *Rural Sociology*. 2019;84(1):28–65.
- 517 20. Sabatini F, Cáceres G, Cerda J. Segregación residencial en las principales  
518 ciudades chilenas: Tendencias de las tres últimas décadas y posibles cursos de  
519 acción. *EURE (Santiago)*. 2001 Dec;27(82):21–42.
- 520 21. Sabatini F, Wormald G, Sierralta C, Peters P. Tendencias de la segregación en las  
521 principales ciudades chilenas: Análisis censal 1982–2002. Vol. 1. 2010.
- 522 22. Villalobos Dintrans P. Do long-term care services match population needs? A  
523 spatial analysis of nursing homes in Chile. *PLoS ONE* . 2018; 13(6): e0199522.
- 524 23. Elacqua G. The impact of school choice and public policy on segregation:  
525 Evidence from Chile. *International Journal of Educational Development*. 2012  
526 May;32(3):444–53.
- 527 24. Crispi F, Cherla A, Vivaldi EA, Mossialos E. Rebuilding the broken health  
528 contract in Chile. *The Lancet*. 2020 Apr 25;395(10233):1342.
- 529 25. Burrows J. Inequalities and healthcare reform in Chile: equity of what? *Journal of*  
530 *Medical Ethics*. 2008 Sep 1;34(9):e13–e13.
- 531 26. Castillo-Laborde C, Aguilera-Sanhueza X, Hirmas-Adaury M, Willemsen IM,  
532 Delgado-Becerra I, Ferrari MN-D, et al. Health insurance scheme performance

- 533 and effects on health and health inequalities in Chile. *MEDICC Review*. 2017  
534 Aug 21;19(2–3):57–64.
- 535 27. Cid Pedraza C, Herrera CA, Prieto Toledo L, Oyarzún F. Mortality outcomes in  
536 hospitals with public, private not-for-profit and private for-profit ownership in  
537 Chile 2001-2010. *Health Policy Plan*. 2015 Mar;30 Suppl 1:i75-81.
- 538 28. Gallardo K, Varas L, Gallardo M. Inequality of opportunity in health: evidence  
539 from Chile. *Rev Saude Publica* [Internet]. 2017 Nov 22 [cited 2020 Aug 24];51.  
540 Available from: <https://www.ncbi.nlm.nih.gov/pmc/articles/PMC5704643/>
- 541 29. Rotarou ES, Sakellariou D. Inequalities in access to health care for people with  
542 disabilities in Chile: the limits of universal health coverage. *Critical Public*  
543 *Health*. 2017 Oct 20;27(5):604–16.
- 544 30. Núñez A, Chi C. Equity in health care utilization in Chile. *International Journal*  
545 *for Equity in Health*. 2013 Aug 12;12(1):58.
- 546 31. Snow J. The Cholera near Golden Square. Buck C, Llopis A, Najera E, Terris M,  
547 editors. Washington DC: Pan American Health Organization; 1949.
- 548 32. Auchincloss AH, Gebreab SY, Mair C, Diez Roux AV. A review of spatial  
549 methods in epidemiology, 2000-2010. *Annu Rev Public Health*. 2012  
550 Apr;33:107–22.
- 551 33. Sannigrahi S, Pilla F, Basu B, Basu AS, Molter A. Examining the association  
552 between socio-demographic composition and COVID-19 fatalities in the  
553 European region using spatial regression approach. *Sustainable Cities and*  
554 *Society*. 2020 Nov 1;62:102418.
- 555 34. Cordes J, Castro MC. Spatial analysis of COVID-19 clusters and contextual  
556 factors in New York City. *Spat Spatiotemporal Epidemiol*. 2020 Aug;34:100355.

- 557 35. Franch-Pardo I, Napoletano BM, Rosete-Verges F, Billa L. Spatial analysis and  
558 GIS in the study of COVID-19. A review. *Science of The Total Environment*.  
559 2020 Oct 15;739:140033.
- 560 36. Ehlert A. The socioeconomic determinants of COVID-19: A spatial analysis of  
561 German county level data. *medRxiv*. 2020 Jul 7;2020.06.25.20140459.
- 562 37. Maroko AR, Nash D, Pavilonis BT. COVID-19 and Inequity: a Comparative  
563 Spatial Analysis of New York City and Chicago Hot Spots. *J Urban Health*. 2020  
564 Jul 20;1–10.
- 565 38. Pedrosa NL, Albuquerque NLS de, Pedrosa NL, Albuquerque NLS de. Spatial  
566 Analysis of COVID-19 cases and intensive care beds in the State of Ceará, Brazil.  
567 *Ciência & Saúde Coletiva*. 2020 Jun;25:2461–8.
- 568 39. Base de Datos COVID-19 | Ministerio de Ciencia [Internet]. [cited 2020 Sep 1].  
569 Available from: <http://www.minciencia.gob.cl/COVID19>
- 570 40. Departamento de Estadísticas e Información de Salud. Ministerio de Salud.  
571 Gobierno de Chile. Defunciones por causa de muerte [Internet]. Defunciones por  
572 causa de muerte 2016-2020(actualización semanal). [cited 2020 Sep 1]. Available  
573 from: <https://deis.minsal.cl/>
- 574 41. Ministerio de Desarrollo Social, Gobierno de Chile. Metodología de diseño  
575 muestral [Internet]. 2018. Available from:  
576 [http://observatorio.ministeriodesarrollosocial.gob.cl/casen-](http://observatorio.ministeriodesarrollosocial.gob.cl/casen-multidimensional/casen/docs/Diseno_Muestral_Casen_2017_MDS.pdf)  
577 [multidimensional/casen/docs/Diseno\\_Muestral\\_Casen\\_2017\\_MDS.pdf](http://observatorio.ministeriodesarrollosocial.gob.cl/casen-multidimensional/casen/docs/Diseno_Muestral_Casen_2017_MDS.pdf)
- 578 42. Liu Y, Mao B, Liang S, Yang J-W, Lu H-W, Chai Y-H, et al. Association  
579 between age and clinical characteristics and outcomes of COVID-19. *Eur Respir*  
580 *J*. 2020;55(5).

- 581 43. Pergolizzi Jr. JV, Magnusson P, LeQuang JA, Breve F, Paladini A, Rekatsina M,  
582 et al. The Current Clinically Relevant Findings on COVID-19 Pandemic. *Anesth*  
583 *Pain Med* [Internet]. 2020 Apr 25 [cited 2020 Sep 1];10(2). Available from:  
584 <https://www.ncbi.nlm.nih.gov/pmc/articles/PMC7352949/>
- 585 44. Jutzeler CR, Bourguignon L, Weis CV, Tong B, Wong C, Rieck B, et al.  
586 Comorbidities, clinical signs and symptoms, laboratory findings, imaging  
587 features, treatment strategies, and outcomes in adult and pediatric patients with  
588 COVID-19: A systematic review and meta-analysis | medRxiv [Internet]. [cited  
589 2020 Sep 1]. Available from:  
590 <https://www.medrxiv.org/content/10.1101/2020.05.20.20103804v1>
- 591 45. Medzikovic L, Cunningham CM, Li M, Amjedi M, Hong J, Ruffenach G, et al.  
592 Sex differences underlying preexisting cardiovascular disease and cardiovascular  
593 injury in COVID-19. *Journal of Molecular and Cellular Cardiology* [Internet].  
594 2020 Aug 22 [cited 2020 Sep 1]; Available from:  
595 <http://www.sciencedirect.com/science/article/pii/S0022282820302558>
- 596 46. Fielding-Miller RK, Sundaram ME, Brouwer K. Social determinants of COVID-  
597 19 mortality at the county level | medRxiv [Internet]. [cited 2020 Sep 1].  
598 Available from:  
599 <https://www.medrxiv.org/content/10.1101/2020.05.03.20089698v2>
- 600 47. Yonker LM, Neilan AM, Bartsch Y, Patel AB, Regan J, Arya P, et al. Pediatric  
601 SARS-CoV-2: Clinical Presentation, Infectivity, and Immune Responses. *The*  
602 *Journal of Pediatrics* [Internet]. 2020 Aug 19 [cited 2020 Sep 1];0(0). Available  
603 from: [https://www.jpeds.com/article/S0022-3476\(20\)31023-4/abstract](https://www.jpeds.com/article/S0022-3476(20)31023-4/abstract)
- 604 48. Heald-Sargent T, Muller WJ, Zheng X, Rippe J, Patel AB, Kociolek LK. Age-  
605 Related Differences in Nasopharyngeal Severe Acute Respiratory Syndrome

- 606 Coronavirus 2 (SARS-CoV-2) Levels in Patients With Mild to Moderate  
607 Coronavirus Disease 2019 (COVID-19). JAMA Pediatr [Internet]. 2020 Jul 30  
608 [cited 2020 Sep 1]; Available from:  
609 <https://jamanetwork.com/journals/jamapediatrics/fullarticle/2768952>
- 610 49. Godfred-Cato S. COVID-19–Associated Multisystem Inflammatory Syndrome in  
611 Children — United States, March–July 2020. MMWR Morb Mortal Wkly Rep  
612 [Internet]. 2020 [cited 2020 Sep 1];69. Available from:  
613 <https://www.cdc.gov/mmwr/volumes/69/wr/mm6932e2.htm>
- 614 50. Jiang L, Tang K, Levin M, Irfan O, Morris SK, Wilson K, et al. COVID-19 and  
615 multisystem inflammatory syndrome in children and adolescents. The Lancet  
616 Infectious Diseases [Internet]. 2020 Aug 17 [cited 2020 Sep 1];0(0). Available  
617 from: [https://www.thelancet.com/journals/laninf/article/PIIS1473-  
618 3099\(20\)30651-4/abstract](https://www.thelancet.com/journals/laninf/article/PIIS1473-3099(20)30651-4/abstract)
- 619 51. Hamidi S, Ewing R, Sabouri S. Longitudinal analyses of the relationship between  
620 development density and the COVID-19 morbidity and mortality rates: Early  
621 evidence from 1,165 metropolitan counties in the United States. Health & Place.  
622 2020 Jul 1;64:102378.
- 623 52. Unspoken inequality: how COVID-19 has exacerbated existing vulnerabilities of  
624 asylum-seekers, refugees, and undocumented migrants in South Africa [Internet].  
625 [cited 2020 Sep 1]. Available from:  
626 <https://www.ncbi.nlm.nih.gov/pmc/articles/PMC7439241/>
- 627 53. Refugee and migrant health in the COVID-19 response - The Lancet [Internet].  
628 [cited 2020 Sep 1]. Available from:  
629 [https://www.thelancet.com/journals/lancet/article/PIIS0140-6736\(20\)30791-  
630 1/fulltext](https://www.thelancet.com/journals/lancet/article/PIIS0140-6736(20)30791-1/fulltext)

- 631 54. Mukherji N. The Social and Economic Factors Underlying the Incidence of  
632 COVID-19 Cases and Deaths in US Counties [Internet]. Health Economics; 2020  
633 May [cited 2020 Sep 1]. Available from:  
634 <http://medrxiv.org/lookup/doi/10.1101/2020.05.04.20091041>
- 635 55. Subsecretaría de Desarrollo Regional y Administrativo, Gobierno de Chile.  
636 Sistema Nacional de Información Municipal [Internet]. 2020 [cited 2020 Sep 1].  
637 Available from: [http://datos.sinim.gov.cl/datos\\_municipales.php](http://datos.sinim.gov.cl/datos_municipales.php)
- 638 56. Ministerio de Vivienda y Urbanismo. Gobierno de Chile. Indicadores Urbanos  
639 [Internet]. Sistema de Indicadores y Estándares de Desarrollo Urbano. 2019 [cited  
640 2020 Sep 1]. Available from: <http://siedu.ine.cl/index.html>
- 641 57. Yang J, Zheng Y, Gou X, Pu K, Chen Z, Guo Q, et al. Prevalence of  
642 comorbidities and its effects in patients infected with SARS-CoV-2: a systematic  
643 review and meta-analysis. *Int J Infect Dis*. 2020 May;94:91–5.
- 644 58. Centro para el control y la prevención de Enfermedades. Adultos mayores y  
645 COVID-19 | CDC [Internet]. Enfermedad del coronavirus 2019 (COVID-19).  
646 [cited 2020 Sep 1]. Available from: [https://espanol.cdc.gov/coronavirus/2019-  
647 ncov/need-extra-precautions/older-adults.html](https://espanol.cdc.gov/coronavirus/2019-ncov/need-extra-precautions/older-adults.html)
- 648 59. World Health Organization. Water, sanitation, hygiene, and waste management  
649 for SARS-CoV-2, the virus that causes COVID-19 [Internet]. [cited 2020 Sep 1].  
650 Available from: [https://www.who.int/publications-detail-redirect/WHO-2019-  
651 nCoV-IPC-WASH-2020.4](https://www.who.int/publications-detail-redirect/WHO-2019-nCoV-IPC-WASH-2020.4)
- 652 60. World Health Organization. Clinical management of COVID-19 [Internet]. [cited  
653 2020 Sep 1]. Available from: [https://www.who.int/publications-detail-  
654 redirect/clinical-management-of-covid-19](https://www.who.int/publications-detail-redirect/clinical-management-of-covid-19)



- 655 61. Wang Z, Tang K. Combating COVID-19: health equity matters. *Nature Medicine*.  
656 2020 Apr;26(4):458–458.
- 657 62. Millett GA, Jones AT, Benkeser D, Baral S, Mercer L, Beyrer C, et al. Assessing  
658 differential impacts of COVID-19 on black communities. *Annals of*  
659 *Epidemiology*. 2020 Jul 1;47:37–44
- 660 63. Maroko AR, Nash D, Pavilonis BT. COVID-19 and Inequity: a Comparative  
661 Spatial Analysis of New York City and Chicago Hot Spots. *J Urban Health*. 2020  
662 Jul 20;1–10.
- 663 64. Delamater PL, Messina JP, Shortridge AM, Grady SC. Measuring geographic  
664 access to health care: raster and network-based methods. *International Journal of*  
665 *Health Geographics*. 2012 May 15;11(1):15.
- 666 65. Syed ST, Gerber BS, Sharp LK. Traveling Towards Disease: Transportation  
667 Barriers to Health Care Access. *J Community Health*. 2013 Oct;38(5):976–93.
- 668 66. Fuchs V. 2011. *Who Shall Live? Health, Economics and Social Choice*. 2nd  
669 Expanded Edition. New Jersey: World Scientific, pp. 166.
- 670 67. Ministerio de Desarrollo Social, Gobierno de Chile. Pobreza y distribución por  
671 ingresos, Presentación de resultados. Encuesta CASEN. [Internet]. 2018. Available  
672 from: [http://observatorio.ministeriodesarrollosocial.gob.cl/casen-](http://observatorio.ministeriodesarrollosocial.gob.cl/casen-multidimensional/casen/docs/Presentacion_Sintesis_de_Resultados_Casen_2017.pdf)  
673 [multidimensional/casen/docs/Presentacion Sintesis de Resultados Casen 2017.](http://observatorio.ministeriodesarrollosocial.gob.cl/casen-multidimensional/casen/docs/Presentacion_Sintesis_de_Resultados_Casen_2017.pdf)  
674 [pdf](http://observatorio.ministeriodesarrollosocial.gob.cl/casen-multidimensional/casen/docs/Presentacion_Sintesis_de_Resultados_Casen_2017.pdf)
- 675 68. Human development, social vulnerability and COVID-19 in Brazil: A study of the  
676 social determinants of health. 2020 May 29 [cited 2020 Sep 1]; Available from:  
677 <https://www.researchsquare.com/article/rs-31527/v1>

- 678 69. Acharya R, Porwal A. A vulnerability index for the management of and response  
679 to the COVID-19 epidemic in India: an ecological study. *The Lancet Global*  
680 *Health*. 2020 Sep 1;8(9):e1142–51.
- 681 70. Thakur N, Lovinsky-Desir S, Bime C, Wisnivesky JP, Celedón JC. The Structural  
682 and Social Determinants of the Racial/Ethnic Disparities in the U.S. COVID-19  
683 Pandemic: What’s Our Role? *Am J Respir Crit Care Med* [Internet]. 2020 Jul 17  
684 [cited 2020 Sep 1]; Available from:  
685 <https://www.atsjournals.org/doi/10.1164/rccm.202005-1523PP>
- 686 71. Holmes BJ. Communicating about emerging infectious disease: The importance  
687 of research. *Health, Risk & Society*. 2008 Aug 1;10(4):349–60.
- 688 72. Vaughan E, Tinker T. Effective Health Risk Communication About Pandemic  
689 Influenza for Vulnerable Populations. *Am J Public Health*. 2009 Oct;99(Suppl  
690 2):S324–32.
- 691 73. Chen X, Chen H. Differences in Preventive Behaviors of COVID-19 between  
692 Urban and Rural Residents: Lessons Learned from A Cross-Sectional Study in  
693 China. *International Journal of Environmental Research and Public Health*. 2020  
694 Jan;17(12):4437.
- 695 74. Abel T, McQueen D. Critical health literacy and the COVID-19 crisis. *Health*  
696 *Promot Int* [Internet]. 2020 Apr 2 [cited 2020 Sep 1]; Available from:  
697 <https://www.ncbi.nlm.nih.gov/pmc/articles/PMC7184450/>
- 698 75. Chinn D. Critical health literacy: A review and critical analysis. *Social Science &*  
699 *Medicine*. 2011 Jul 1;73(1):60–7.
- 700 76. Cartenì A, Di Francesco L, Martino M. How mobility habits influenced the spread  
701 of the COVID-19 pandemic: Results from the Italian case study. *Science of The*  
702 *Total Environment*. 2020 Nov 1;741:140489.

- 703 77. Zhou Y, Xu R, Hu D, Yue Y, Li Q, Xia J. Effects of human mobility restrictions  
704 on the spread of COVID-19 in Shenzhen, China: a modelling study using mobile  
705 phone data. *The Lancet Digital Health*. 2020 Aug 1;2(8):e417–24.
- 706 78. Ministerio de Bienes Nacionales, Infraestructura de datos geoespaciales. Límites  
707 y fronteras [Internet]. Límites y fronteras. Planilla de códigos únicos territoriales.  
708 [cited 2020 Sep 1]. Available from: [http://www.ide.cl/index.php/limites-y-](http://www.ide.cl/index.php/limites-y-fronteras)  
709 [fronteras](http://www.ide.cl/index.php/limites-y-fronteras)
- 710 79. Macintyre S, Ellaway E. Neighborhoods and Health: An Overview. In: Kawachi  
711 I, Berkman LS (eds). *Neighborhoods and Health*. Oxford: Oxford University  
712 Press. 2003 ISBN-13 : 978019513838
- 713 80. Harling G, Castro MC. A spatial analysis of social and economic determinants of  
714 tuberculosis in Brazil. *Health & Place*. 2014 Jan 1;25:56–67.
- 715 81. Anselin L. *Spatial Econometrics: Methods and Models*. 1st ed. Springer  
716 Netherlands; 1988. XVI, 284. (4).
- 717 82. Anselin L. *Spatial Econometrics*. In B.H. Baltagi (Ed.). *A Companion to*  
718 *Theoretical Econometrics* . Wiley-Blackwell: Malden, MA. 2003
- 719 83. Manfred M. Fischer, Arthur Getis, Manfred M. Fischer. *Handbook of Applied*  
720 *Spatial Analysis*. 1st ed. Springer-Verlag Berlin Heidelberg; 2010. XV, 811.
- 721 84. Maroko AR, Nash D, Pavilonis BT. COVID-19 and Inequity: a Comparative  
722 Spatial Analysis of New York City and Chicago Hot Spots. *J Urban Health*. 2020  
723 Jul 20;1–10.
- 724 85. Peters DJ. Community Susceptibility and Resiliency to COVID-19 Across the  
725 Rural-Urban Continuum in the United States. *The Journal of Rural Health*.  
726 2020;36(3):446–56.

- 727 86. Zhang CH, Schwartz GG. Spatial Disparities in Coronavirus Incidence and  
728 Mortality in the United States: An Ecological Analysis as of May 2020. The  
729 Journal of Rural Health. 2020;36(3):433–45.
- 730 87. Hawkins D. Social Determinants of COVID-19 in Massachusetts, United States:  
731 An Ecological Study. J Prev Med Public Health. 2020 Jul;53(4):220–7.
- 732 88. Macharia PM, Joseph NK, Okiro EA. A vulnerability index for COVID-19:  
733 spatial analysis at the subnational level in Kenya. BMJ Global Health. 2020 Aug  
734 1;5(8):e003014.
- 735 89. Nayak A, Islam SJ, Mehta A, Ko Y-A, Patel SA, Goyal A, et al. Impact of Social  
736 Vulnerability on COVID-19 Incidence and Outcomes in the United States.  
737 medRxiv [Internet]. 2020 Apr 17 [cited 2020 Sep 1]; Available from:  
738 <https://www.ncbi.nlm.nih.gov/pmc/articles/PMC7217093/>
- 739 90. Ramírez IJ, Lee J. COVID-19 Emergence and Social and Health Determinants in  
740 Colorado: A Rapid Spatial Analysis. Int J Environ Res Public Health [Internet].  
741 2020 Jun [cited 2020 Sep 1];17(11). Available from:  
742 <https://www.ncbi.nlm.nih.gov/pmc/articles/PMC7312929/>
- 743 91. Santos JPC dos, Siqueira ASP, Praça HLF, Albuquerque HG. Vulnerability to  
744 severe forms of COVID-19: an intra-municipal analysis in the city of Rio de  
745 Janeiro, Brazil. Cadernos de Saúde Pública [Internet]. 2020 [cited 2020 Sep  
746 1];36(5). Available from:  
747 [http://www.scielo.br/scielo.php?script=sci\\_abstract&pid=S0102-  
748 311X2020000506001&lng=en&nrm=iso&tlng=pt](http://www.scielo.br/scielo.php?script=sci_abstract&pid=S0102-311X2020000506001&lng=en&nrm=iso&tlng=pt)
- 749 92. Hamadani JD, Hasan MI, Baldi AJ, Hossain SJ, Shiraji S, Bhuiyan MSA, et al.  
750 Immediate impact of stay-at-home orders to control COVID-19 transmission on  
751 socioeconomic conditions, food insecurity, mental health, and intimate partner

- 752 violence in Bangladeshi women and their families: an interrupted time series. The  
753 Lancet Global Health. 2020 Aug;S2214109X20303661.
- 754 93. Martin A, Markhvida M, Hallegatte S, Walsh B. Socio-Economic Impacts of  
755 COVID-19 on Household Consumption and Poverty. Econ Disaster Clim Chang.  
756 2020 Jul 23;1–27.
- 757 94. Alkhamis MA, Al Youha S, Khajah MM, Ben Haider N, Alhardan S, Nabeel A, et  
758 al. Spatiotemporal dynamics of the COVID-19 pandemic in the State of Kuwait.  
759 International Journal of Infectious Diseases. 2020 Sep 1;98:153–60.
- 760

761            **Supplementary material 1.** Date used to establish the period of analysis in each  
762            municipality

763

764            **Supplementary material 2.** Index of multidimensional poverty

765

766            **Supplementary material 3.** Definition of variables

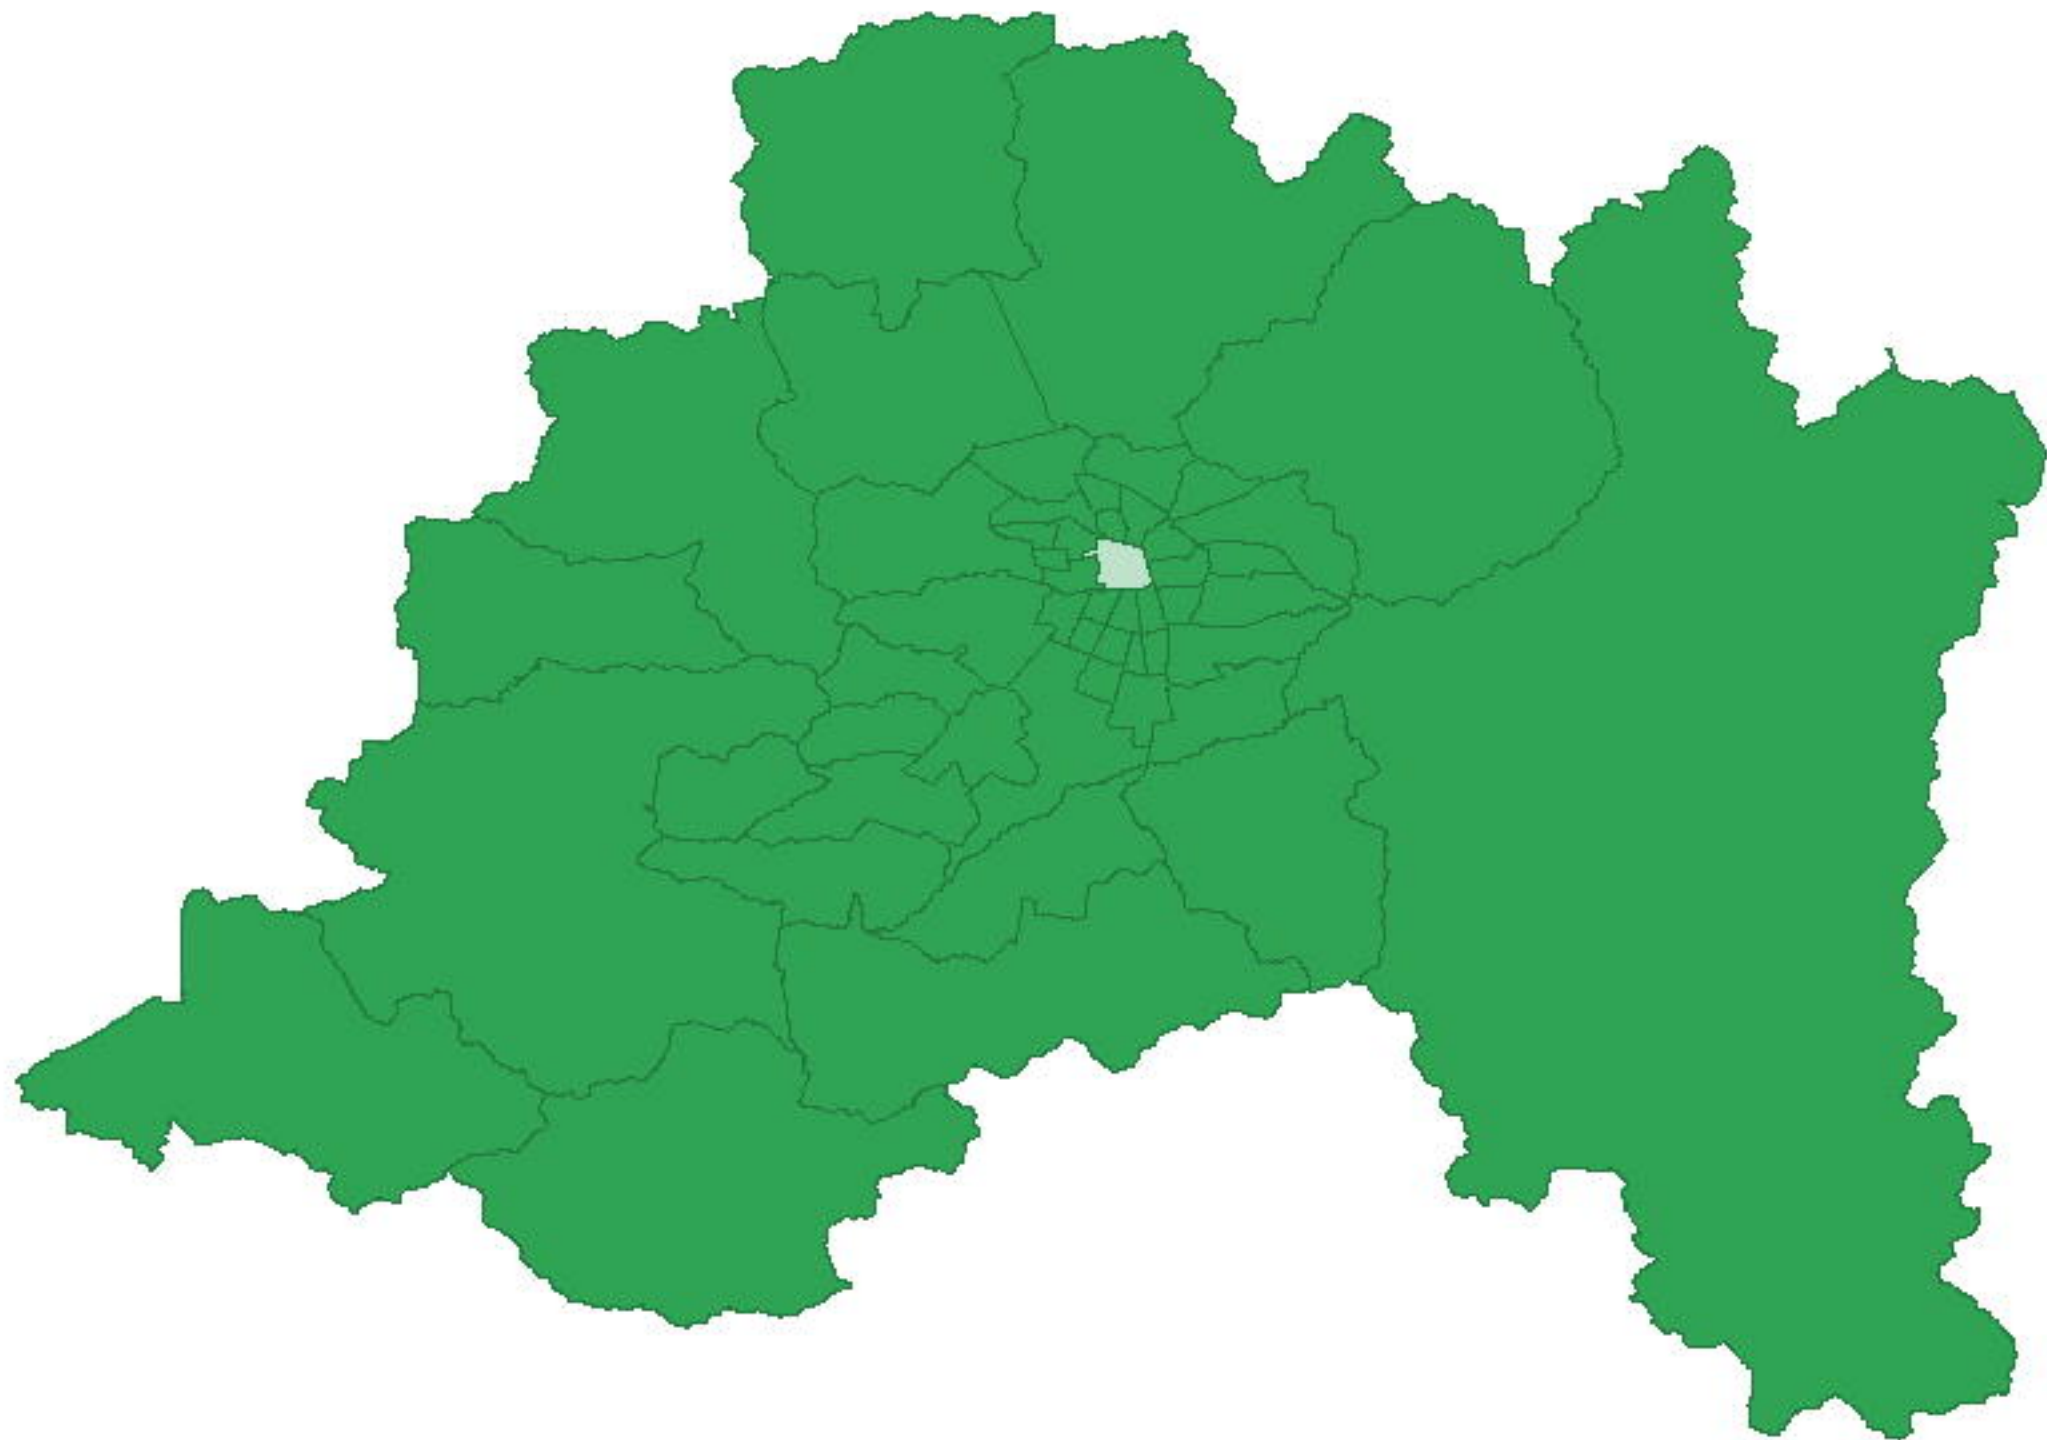

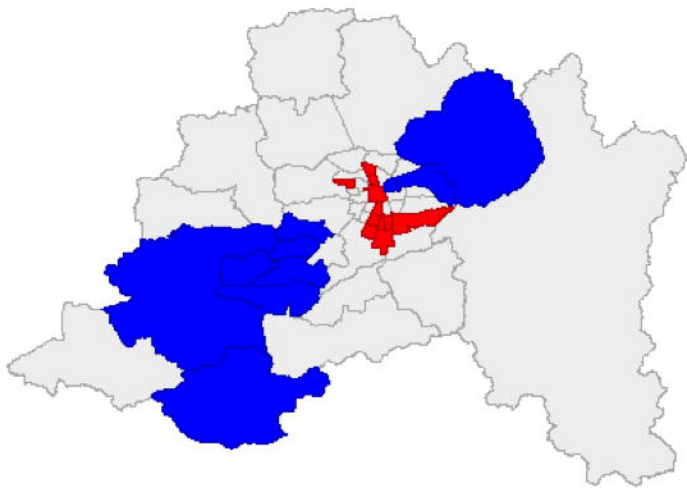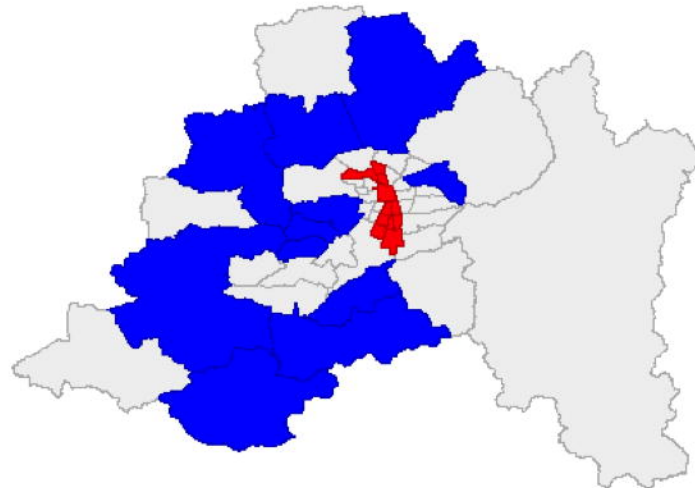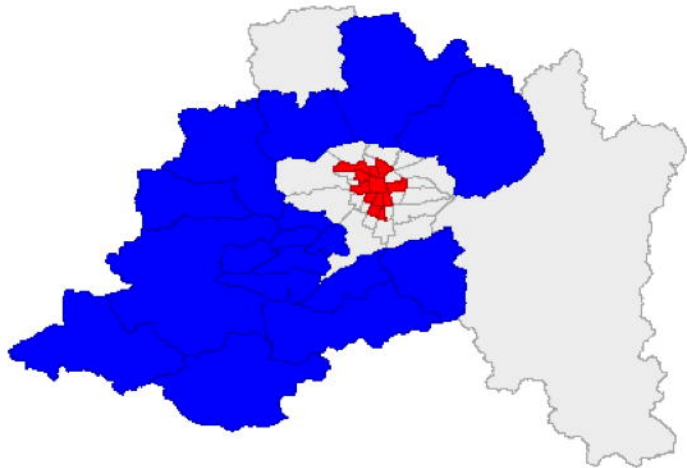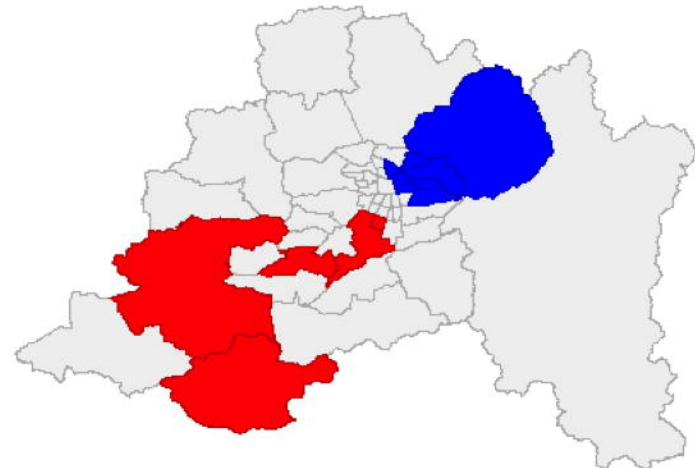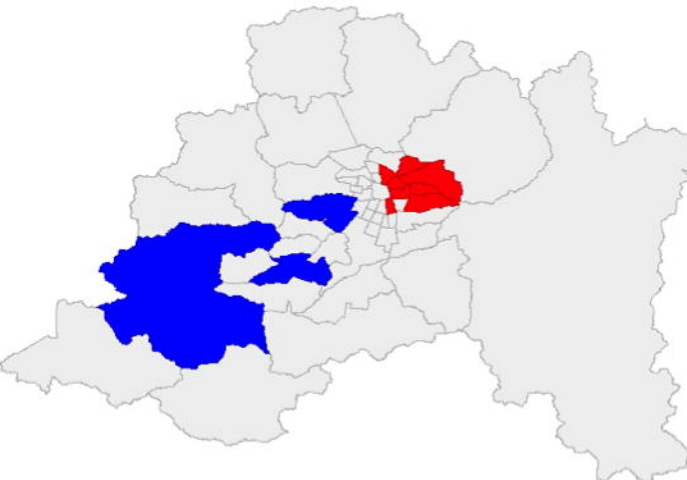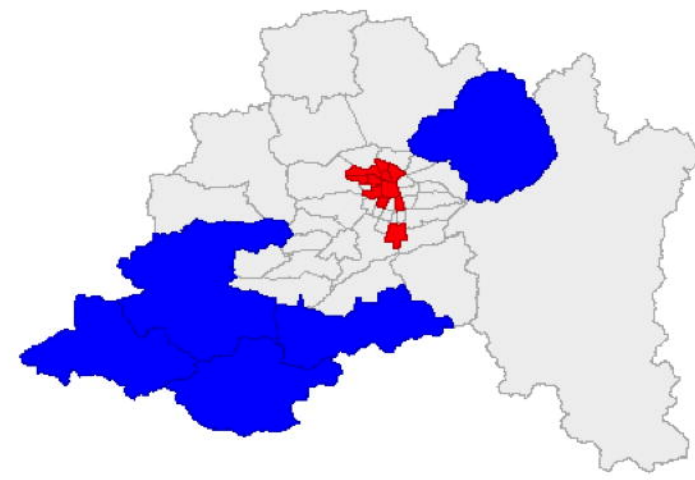

Source: https://medrxiv.org/content/10.1101/2020.09.15.20194951v1.full.pdf
